# Supplementary material for: Comparison of T7E1 and Surveyor Mismatch Cleavage Assays to Detect Mutations Triggered by Engineered Nucleases
Source: PubMed Central journal article supplement (PMC4349094; doi:10.1534/g3.114.015834), 2015-01-07
Supplement: supp_g3.114.015834_015834SI.pdf [file supp_g3.114.015834_015834SI.pdf]

**Comparison of T7E1 and Surveyor mismatch cleavage assays to detect mutations  
triggered by engineered nucleases**

Léna Vouillot, Aurore Thélie and Nicolas Pollet

Institute of Systems and Synthetic Biology, CNRS, Université d'Evry Val d'Essonne, Bâtiment 3, Genopole® campus 3,  
1, rue Pierre Fontaine, F-91058 Evry, France.

**Corresponding author:** Nicolas Pollet, Institute of Systems and Synthetic Biology, CNRS, Université d'Evry-Val-  
d'Essonne, Genavenir 3, Genopole campus 3, 1, rue Pierre Fontaine, F-91058 Evry, France, Phone +33 (0)164982748  
Fax. +33 (0)169361119 Email: Nicolas.Pollet@issb.genopole.fr

**DOI: 10.1534/g3.114.015834**

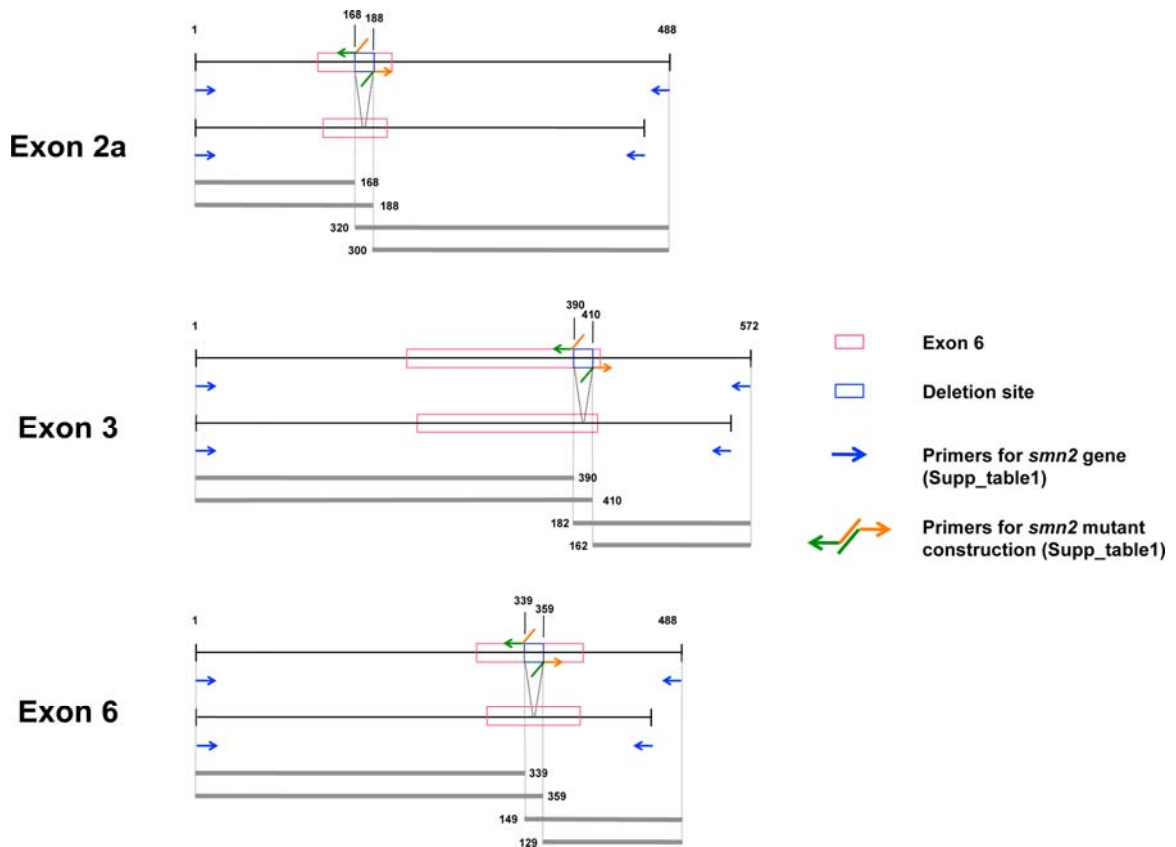

**Figure S1** Structure of the PCR products corresponding to *smn* exon 2a, exon 3 and exon 6. Both the wild-type and constructed mutant forms are depicted.

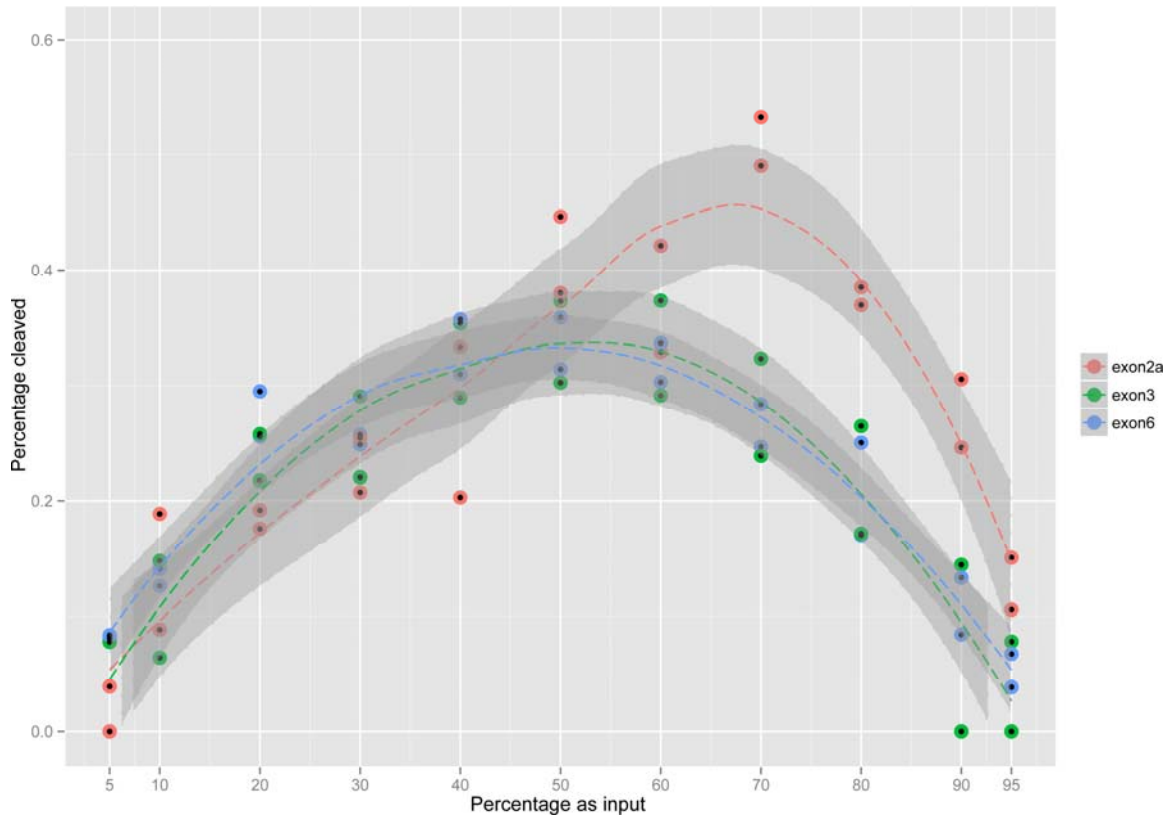

**Figure S2** This graph shows the fraction of cleaved products from all products (y axis) in a mixture composed of various quantities of deletion mutants of exon 2a, 3 and 6 in a population of mutant and wild-type DNA molecules (x axis). Both T7E1 and Surveyor digestion products are shown. The grey intervals correspond to the variation and the dotted line corresponds to a loess regression model fitting.

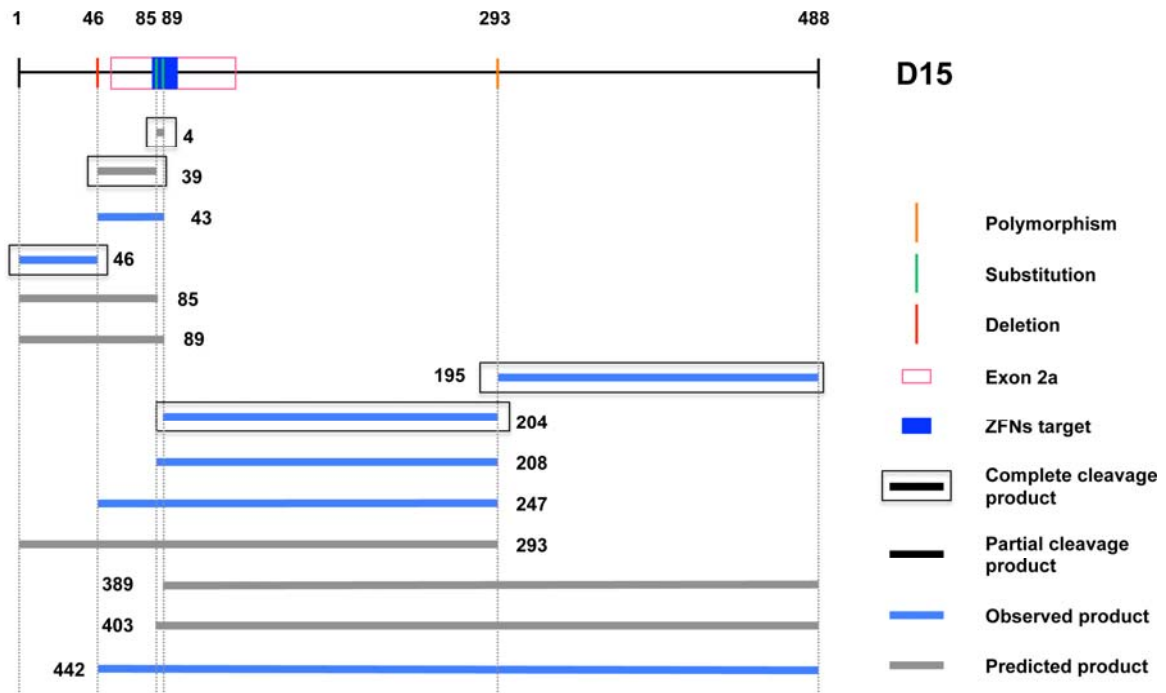

**Figure S3** Predicted cleavage map of all mismatches between D15 and wild-type *smn* exon 2a alleles.

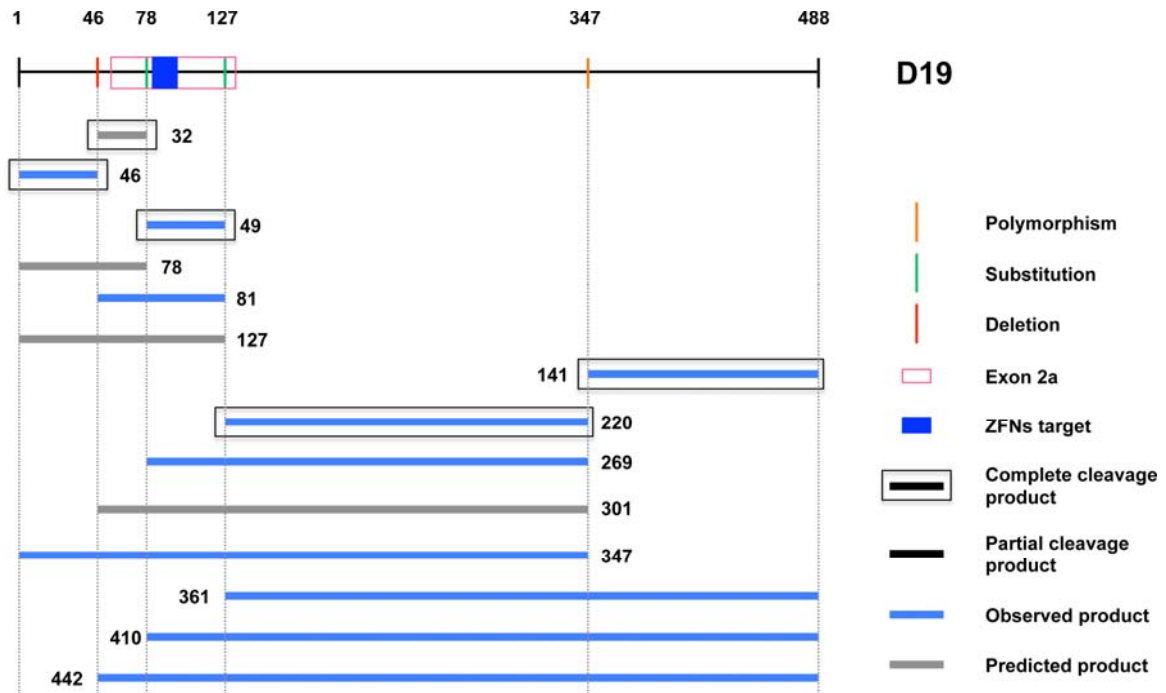

**Figure S4** Predicted cleavage map of all mismatches between D19 and wild-type *smn* exon 2a alleles.

**Table S1 Sequence of primers used in this work**

| <i>smn2</i> gene                | Primer sequences 5'-3'              |                                     |         |
|---------------------------------|-------------------------------------|-------------------------------------|---------|
|                                 | Forward                             | Reverse                             | Ta (°C) |
| exon2a                          | TCTCCAACCTCTTGTGTTTGTG              | TATTCCAACACAGGGGCCAC                | 58      |
| exon3                           | TGCCAAACGAATGAATGTTG                | CCTTAGCACCTAGGCAGTGG                | 50      |
| exon6                           | TTCACATTCAAGAAGTCGATAGAA            | GAATTGATAGATGCAGATCAACC             | 50      |
|                                 |                                     |                                     |         |
| <i>Constructions of mutants</i> | Primer sequences 5'-3'              |                                     |         |
|                                 | Forward                             | Reverse                             | Ta (°C) |
| 20del_exon2a                    | GATACAGCTCTCATTCTTCTTTTTAAGGTAAGAAT | TACCTTAAAAGAAGAAATGAGAGCTGTATCGTCCC | 58      |
| 20del_exon3                     | TGGCTGACCTGCGCTGAAAGTGACCAGAGGGAGCA | CCTCTGGTCACTTTCAGCGCAGGTCAGCCAAACTT | 50      |
| 20del_exon6                     | TCCTCCAATGAGCCCAGGCATTGGGCAGTATGCTG | TACTGCCCAATGCCTGGGCTCATTGGAGGAGGTGG | 50      |

Table S2 List of fragments obtained after T7E1 or Surveyor assays on D15 and D19 clones.

| Sample              | Observed Size (bp)* | Predicted size of matching fragment (bp) |                   |           |
|---------------------|---------------------|------------------------------------------|-------------------|-----------|
|                     |                     | Complete digestion                       | Partial digestion | Uncleaved |
| D15 T7E1            | 23                  |                                          |                   |           |
| <b>D15 T7E1</b>     | <b>47</b>           | <b>46</b>                                | <b>43</b>         |           |
| <b>D15 T7E1</b>     | <b>210</b>          | <b>195, 204</b>                          | <b>208</b>        |           |
| <b>D15 T7E1</b>     | <b>250</b>          |                                          | <b>247</b>        |           |
| D15 T7E1            | 480                 |                                          |                   |           |
| <i>D15 T7E1</i>     | 516                 |                                          |                   | 488       |
| D15 Surveyor        | 51                  | 46                                       |                   |           |
| D15 Surveyor        | 55                  |                                          |                   |           |
| D15 Surveyor        | 197                 | 195                                      |                   |           |
| <b>D15 Surveyor</b> | <b>212</b>          | <b>204</b>                               | <b>208</b>        |           |
| <b>D15 Surveyor</b> | <b>251</b>          |                                          | <b>247</b>        |           |
| <b>D15 Surveyor</b> | <b>426</b>          |                                          | <b>442</b>        |           |
| <i>D15 Surveyor</i> | 516                 |                                          |                   | 488       |
| D19 T7E1            | 53                  | 46, 49                                   |                   |           |
| <b>D19 T7E1</b>     | <b>91</b>           |                                          | <b>81</b>         |           |
| D19 T7E1            | 223                 | 220                                      |                   |           |
| <b>D19 T7E1</b>     | <b>257</b>          |                                          | <b>269</b>        |           |
| <b>D19 T7E1</b>     | <b>357</b>          |                                          | <b>347</b>        |           |
| <b>D19 T7E1</b>     | <b>373</b>          |                                          | <b>361</b>        |           |
| <b>D19 T7E1</b>     | <b>388</b>          |                                          | <b>410</b>        |           |
| <b>D19 T7E1</b>     | <b>471</b>          |                                          | <b>442</b>        |           |
| <i>D19 T7E1</i>     | 518                 |                                          |                   | 488       |
| D19 Surveyor        | 143                 | 141                                      |                   |           |
| <b>D19 Surveyor</b> | <b>253</b>          |                                          | <b>269</b>        |           |
| <b>D19 Surveyor</b> | <b>373</b>          |                                          | <b>361</b>        |           |
| <b>D19 Surveyor</b> | <b>438</b>          |                                          | <b>442</b>        |           |
| D19 Surveyor        | 472                 |                                          |                   |           |
| <i>D19 Surveyor</i> | 513                 |                                          |                   | 488       |

ND: Non determined

\* The observed size is according to the Agilent fragment analysis Expert software report. Sizing accuracy coefficient of variation is +/- 10%, and increases with size.
