# Supplementary material for: Comparison of T7E1 and Surveyor Mismatch Cleavage Assays to Detect Mutations Triggered by Engineered Nucleases
Source: PubMed Central journal article supplement (PMC4349094; doi:10.1534/g3.114.015834), 2015-01-07
Supplement: supp_g3.114.015834_FigureS1.pdf [file supp_g3.114.015834_FigureS1.pdf]

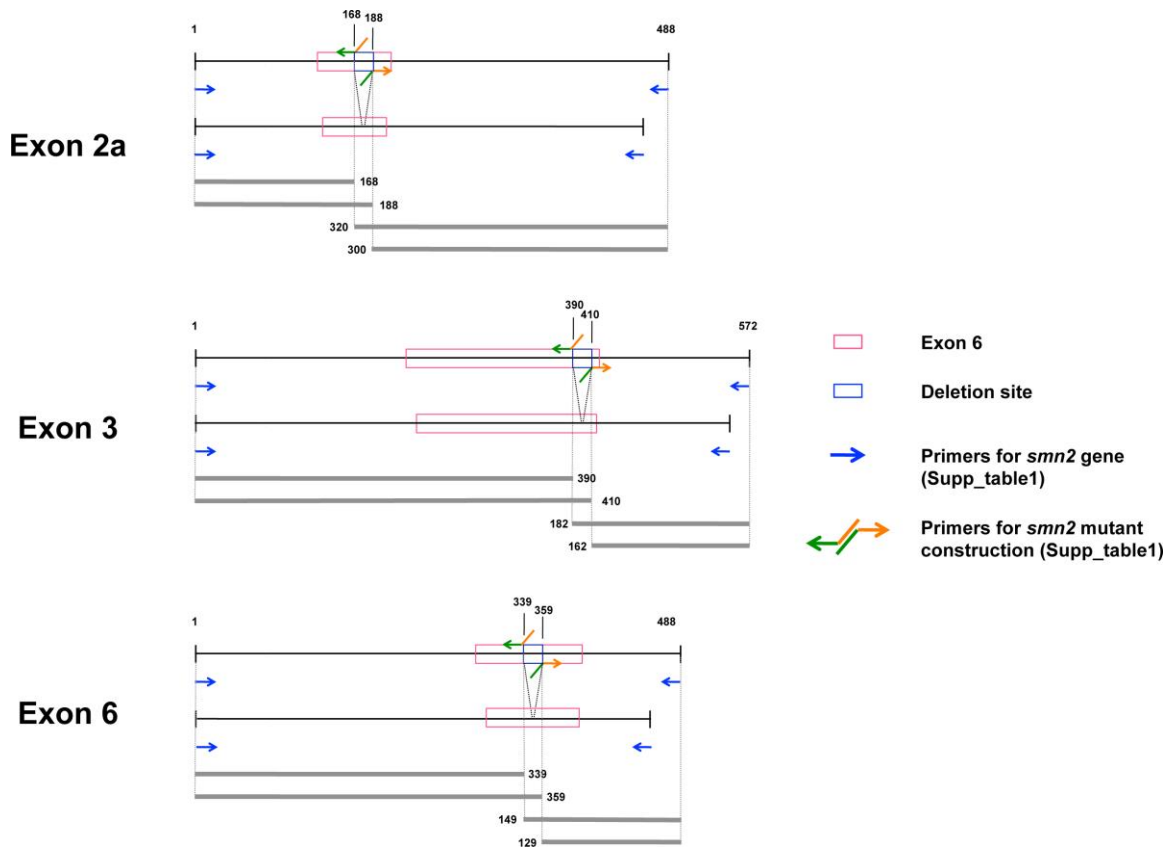

**Figure S1** Structure of the PCR products corresponding to *smn* exon 2a, exon 3 and exon 6. Both the wild-type and constructed mutant forms are depicted.
