# Supplementary material for: Comparison of T7E1 and Surveyor Mismatch Cleavage Assays to Detect Mutations Triggered by Engineered Nucleases
Source: PubMed Central journal article supplement (PMC4349094; doi:10.1534/g3.114.015834), 2015-01-07
Supplement: supp_g3.114.015834_FigureS3.pdf [file supp_g3.114.015834_FigureS3.pdf]

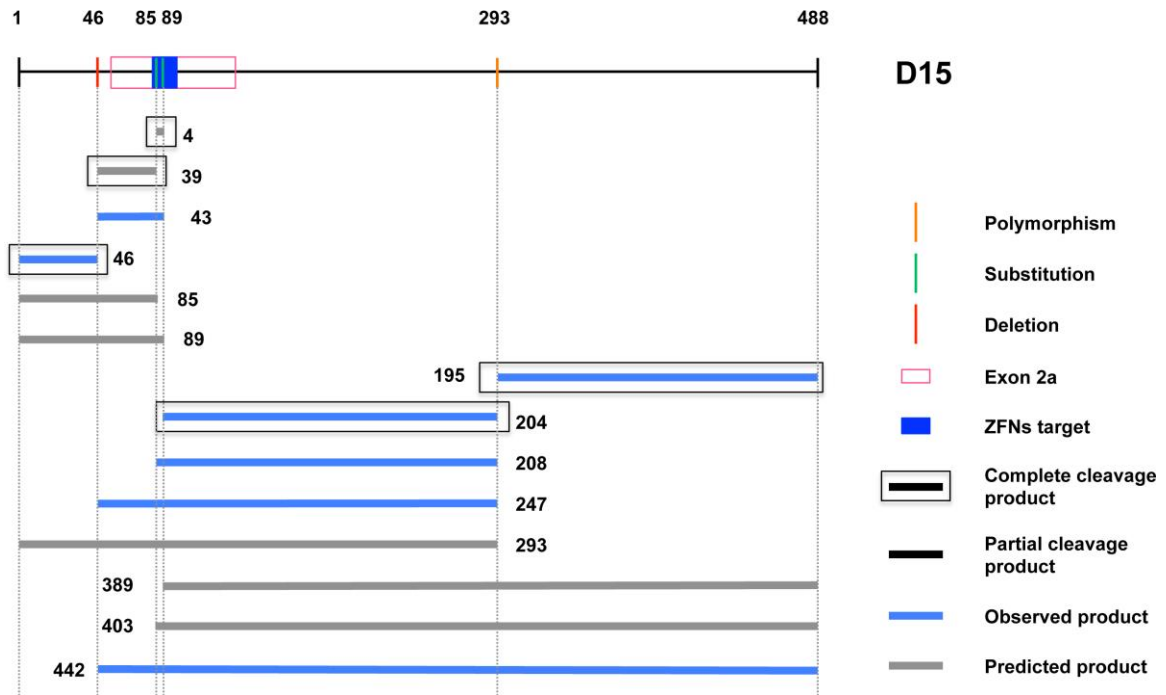

**Figure S3** Predicted cleavage map of all mismatches between D15 and wild-type *smn* exon 2a alleles.
