# Supplementary material for: Comparison of T7E1 and Surveyor Mismatch Cleavage Assays to Detect Mutations Triggered by Engineered Nucleases
Source: PubMed Central journal article supplement (PMC4349094; doi:10.1534/g3.114.015834), 2015-01-07
Supplement: supp_g3.114.015834_TableS1.pdf [file supp_g3.114.015834_TableS1.pdf]

**Table S1 Sequence of primers used in this work**

| <i>smn2</i> gene                | Primer sequences 5'-3'              |                                     |         |
|---------------------------------|-------------------------------------|-------------------------------------|---------|
|                                 | Forward                             | Reverse                             | Ta (°C) |
| exon2a                          | TCTCCAACCTCTTGTGTTTGTG              | TATTCCAACACAGGGGCCAC                | 58      |
| exon3                           | TGCCAAACGAATGAATGTTG                | CCTTAGCACCTAGGCAGTGG                | 50      |
| exon6                           | TTCACATTCAAGAAGTCGATAGAA            | GAATTGATAGATGCAGATCAACC             | 50      |
|                                 |                                     |                                     |         |
| <i>Constructions of mutants</i> | Primer sequences 5'-3'              |                                     |         |
|                                 | Forward                             | Reverse                             | Ta (°C) |
| 20del_exon2a                    | GATACAGCTCTCATTCTTCTTTTTAAGGTAAGAAT | TACCTTAAAAGAAGAAATGAGAGCTGTATCGTCCC | 58      |
| 20del_exon3                     | TGGCTGACCTGCGCTGAAAGTGACCAGAGGGAGCA | CCTCTGGTCACTTTCAGCGCAGGTCAGCCAACTT  | 50      |
| 20del_exon6                     | TCCTCCAATGAGCCCAGGCATTGGGCAGTATGCTG | TACTGCCCAATGCCTGGGCTCATTGGAGGAGGTGG | 50      |
