# Supplementary material for: Comparison of T7E1 and Surveyor Mismatch Cleavage Assays to Detect Mutations Triggered by Engineered Nucleases
Source: PubMed Central journal article supplement (PMC4349094; doi:10.1534/g3.114.015834), 2015-01-07
Supplement: supp_g3.114.015834_TableS2.pdf [file supp_g3.114.015834_TableS2.pdf]

Table S2 List of fragments obtained after T7E1 or Surveyor assays on D15 and D19 clones.

| Sample              | Observed Size (bp)* | Predicted size of matching fragment (bp) |                   |           |
|---------------------|---------------------|------------------------------------------|-------------------|-----------|
|                     |                     | Complete digestion                       | Partial digestion | Uncleaved |
| D15 T7E1            | 23                  |                                          |                   |           |
| <b>D15 T7E1</b>     | <b>47</b>           | <b>46</b>                                | <b>43</b>         |           |
| <b>D15 T7E1</b>     | <b>210</b>          | <b>195, 204</b>                          | <b>208</b>        |           |
| <b>D15 T7E1</b>     | <b>250</b>          |                                          | <b>247</b>        |           |
| D15 T7E1            | 480                 |                                          |                   |           |
| <i>D15 T7E1</i>     | 516                 |                                          |                   | 488       |
| D15 Surveyor        | 51                  | 46                                       |                   |           |
| D15 Surveyor        | 55                  |                                          |                   |           |
| D15 Surveyor        | 197                 | 195                                      |                   |           |
| <b>D15 Surveyor</b> | <b>212</b>          | <b>204</b>                               | <b>208</b>        |           |
| <b>D15 Surveyor</b> | <b>251</b>          |                                          | <b>247</b>        |           |
| <b>D15 Surveyor</b> | <b>426</b>          |                                          | <b>442</b>        |           |
| <i>D15 Surveyor</i> | 516                 |                                          |                   | 488       |
| D19 T7E1            | 53                  | 46, 49                                   |                   |           |
| <b>D19 T7E1</b>     | <b>91</b>           |                                          | <b>81</b>         |           |
| D19 T7E1            | 223                 | 220                                      |                   |           |
| <b>D19 T7E1</b>     | <b>257</b>          |                                          | <b>269</b>        |           |
| <b>D19 T7E1</b>     | <b>357</b>          |                                          | <b>347</b>        |           |
| <b>D19 T7E1</b>     | <b>373</b>          |                                          | <b>361</b>        |           |
| <b>D19 T7E1</b>     | <b>388</b>          |                                          | <b>410</b>        |           |
| <b>D19 T7E1</b>     | <b>471</b>          |                                          | <b>442</b>        |           |
| <i>D19 T7E1</i>     | 518                 |                                          |                   | 488       |
| D19 Surveyor        | 143                 | 141                                      |                   |           |
| <b>D19 Surveyor</b> | <b>253</b>          |                                          | <b>269</b>        |           |
| <b>D19 Surveyor</b> | <b>373</b>          |                                          | <b>361</b>        |           |
| <b>D19 Surveyor</b> | <b>438</b>          |                                          | <b>442</b>        |           |
| D19 Surveyor        | 472                 |                                          |                   |           |
| <i>D19 Surveyor</i> | 513                 |                                          |                   | 488       |

ND: Non determined

\* The observed size is according to the Agilent fragment analysis Expert software report. Sizing accuracy coefficient of variation is +/- 10%, and increases with size.
